# Supplementary material for: Plasma Trans Fatty Acid Levels, Cardiovascular Risk Factors and Lifestyle: Results from the Akershus Cardiac Examination 1950 Study
Source: PubMed Central journal article supplement (PMC7284775; doi:10.3390/nu12051419), 2020-05-14
Supplement: nutrients-12-01419-s001.pdf [file nutrients-12-01419-s001.pdf]

**Supplementary Table 1.** Characteristics of study participants according to quartiles of ruminant trans fatty acid levels.

|                                                    | All participants | Quartile 1      | Quartile 2       | Quartile 3       | Quartile 4      | p for trend | p for Q1 vs. Q4 |
|----------------------------------------------------|------------------|-----------------|------------------|------------------|-----------------|-------------|-----------------|
| <b>Ruminant trans fatty acid level, wt%</b>        | <b>0.14-2.87</b> | <b>≤1.45</b>    | <b>1.46–1.60</b> | <b>1.61-1.75</b> | <b>≥1.76</b>    |             |                 |
| Number of participants                             | 3683             | 900             | 995              | 874              | 914             |             |                 |
| Age, years                                         | 63.9 (0.6)       | 63.8 (0.6)      | 63.9 (0.6)       | 64.0 (0.6)       | 64.0 (0.6)      | <0.001      | <0.001          |
| Gender (Male), %                                   | 51.3<br>(n=1890) | 51.8 (n=466)    | 49.8<br>(n=496)  | 51.7<br>(n=452)  | 52.1<br>(n=476) | 0.75        | 0.90            |
| Weekly intake of milk, 1 glass or more, %          | 56.5<br>(n=2042) | 56.2<br>(n=491) | 57.9<br>(n=566)  | 55.6<br>(n=480)  | 56.2<br>(n=505) | 0.76        | 0.99            |
| Use butter or margarine in cooking, %              | 50.4<br>(n=1782) | 47.8<br>(n=407) | 49.5<br>(n=474)  | 51.5<br>(n=435)  | 52.6<br>(n=466) | 0.19        | 0.04            |
| Use oil in cooking, %                              | 48.2<br>(n=1706) | 50.9<br>(n=434) | 48.9<br>(n=468)  | 47.5<br>(n=401)  | 45.5<br>(n=403) | 0.14        | 0.02            |
| Weekly intake of fast food, once or more, %        | 18.1<br>(n=651)  | 17.0<br>(n=148) | 17.5<br>(n=170)  | 20.7<br>(n=178)  | 17.2<br>(n=155) | 0.15        | 0.91            |
| Current smoker, %                                  | 14.5<br>(n=530)  | 12.9<br>(n=115) | 12.4<br>(n=122)  | 16.0<br>(n=139)  | 17.0<br>(n=154) | 0.01        | 0.02            |
| Alcohol consumption, (≥ 2 times weekly), %         | 47.4<br>(n=1739) | 43.5<br>(n=390) | 45.9<br>(n=456)  | 48.7<br>(n=425)  | 51.5<br>(n=468) | 0.01        | 0.001           |
| Alcohol consumption, > 5 units at same occasion, % | 46.6<br>(n=1701) | 40.0<br>(n=354) | 42.7<br>(n=422)  | 50.6<br>(n=440)  | 53.7<br>(n=485) | <0.001      | <0.001          |
| Physical activity (≥ 2 times weekly), %            | 61.7<br>(n=2240) | 59.2<br>(n=520) | 63.6<br>(n=620)  | 62.8<br>(n=544)  | 61.6<br>(n=556) | 0.27        | 0.30            |
| Higher education, %                                | 46.5             | 45.2            | 46.8             | 49.5             | 44.6            | 0.17        | 0.80            |

|                                                              |                  |                 |                 |                 |                 |        |        |
|--------------------------------------------------------------|------------------|-----------------|-----------------|-----------------|-----------------|--------|--------|
|                                                              | (n=1708)         | (n=405)         | (n=465)         | (n=432)         | (n=406)         |        |        |
| Hypertension, %                                              | 62.0<br>(n=2282) | 63.9 (n=575)    | 62.1<br>(n=617) | 60.2<br>(n=526) | 61.7<br>(n=564) | 0.45   | 0.34   |
| Hypercholesterolemia, %                                      | 52.6<br>(n=1931) | 52.2<br>(n=468) | 51.2<br>(n=508) | 51.7<br>(n=450) | 55.3<br>(n=505) | 0.27   | 0.18   |
| Cerebrovascular disease, %                                   | 3.7<br>(n=138)   | 3.6<br>(n=32)   | 3.3<br>(n=33)   | 3.5<br>(n=31)   | 4.6<br>(n=42)   | 0.47   | 0.26   |
| Coronary artery disease, %                                   | 7.0<br>(n=259)   | 5.1<br>(n=46)   | 6.5<br>(n=65)   | 6.6<br>(n=58)   | 9.8<br>(n=90)   | 0.001  | <0.001 |
| Diabetes mellitus, %                                         | 8.5<br>(n=313)   | 12.2<br>(n=110) | 9.8<br>(n=98)   | 6.3<br>(n=55)   | 5.5<br>(n=50)   | <0.001 | <0.001 |
| Obesity (BMI $\geq$ 30), %                                   | 22.6<br>(n=831)  | 29.7<br>(n=267) | 22.9<br>(n=228) | 19.3<br>(n=169) | 18.3<br>(n=167) | <0.001 | <0.001 |
| CKD stages 3-5 (eGFR <60 ml/min<br>x 1.73m <sup>2</sup> ), % | 3.9<br>(n=142)   | 3.2<br>(n=29)   | 3.7<br>(n=37)   | 3.8<br>(n=33)   | 4.7<br>(n=43)   | 0.42   | 0.10   |
| Medication, %                                                |                  |                 |                 |                 |                 |        |        |
| Diuretics                                                    | 3.1              | 4.0             | 2.4             | 3.5             | 2.4             | 0.11   | 0.05   |
| Beta blockers                                                | 13.4             | 13.0            | 12.3            | 13.6            | 14.7            | 0.47   | 0.31   |
| Calcium channel blockers                                     | 8.1              | 8.1             | 9.1             | 8.1             | 7.1             | 0.45   | 0.99   |
| ACEi or ARB                                                  | 26.9             | 29.4            | 26.0            | 26.0            | 26.4            | 0.28   | 0.14   |
| Lipid-lowering drugs                                         | 26.1             | 22.3            | 23.9            | 25.9            | 32.6            | <0.001 | <0.001 |
| Glucose-lowering drugs                                       | 5.4              | 7.8             | 6.1             | 4.2             | 3.4             | <0.001 | <0.001 |
| Systolic blood pressure, mmHg                                | 138 (19)         | 139 (18)        | 139 (19)        | 137 (19)        | 136 (20)        | 0.003  | 0.001  |
| Diastolic blood pressure, mmHg                               | 77 (10)          | 78 (10)         | 77 (10)         | 77 (10)         | 76 (10)         | <0.001 | <0.001 |

|                                                |               |               |               |               |               |        |        |
|------------------------------------------------|---------------|---------------|---------------|---------------|---------------|--------|--------|
| HDL cholesterol, <i>mmol/L</i>                 | 1.5 (0.5)     | 1.5 (0.5)     | 1.5 (0.5)     | 1.5 (0.5)     | 1.6 (0.5)     | <0.001 | <0.001 |
| LDL cholesterol, <i>mmol/L</i>                 | 3.3 (1.0)     | 3.4 (1.0)     | 3.4 (1.0)     | 3.3 (0.9)     | 3.1 (1.0)     | <0.001 | <0.001 |
| Triglycerides, <i>mmol/L</i>                   | 1.2 (0.4-2.0) | 1.4 (0.4-2.4) | 1.2 (0.4-2.0) | 1.1 (0.3-1.9) | 1.0 (0.4-1.6) | <0.001 | <0.001 |
| Fasting plasma glucose, <i>mmol/L</i>          | 5.3 (4.5-6.1) | 5.4 (4.5-6.3) | 5.3 (4.5-6.1) | 5.3 (4.5-6.1) | 5.2 (4.5-5.9) | <0.001 | <0.001 |
| HbA1c, %                                       | 5.7 (5.3-6.2) | 5.8 (5.3-6.3) | 5.7 (5.3-6.1) | 5.7 (5.3-6.1) | 5.6 (5.2-6.0) | <0.001 | <0.001 |
| Body mass index (BMI), <i>kg/m<sup>2</sup></i> | 27.1 (4.4)    | 28.0 (4.4)    | 27.4 (4.4)    | 26.9 (4.2)    | 26.4 (4.5)    | <0.001 | <0.001 |
| eGFR, <i>ml/min x 1.73m<sup>2</sup></i>        | 83 (11.9)     | 84 (11.6)     | 83 (12.2)     | 83 (12.0)     | 83 (11.8)     | 0.14   | 0.50   |
| cIMT, <i>mm</i>                                | 0.73 (0.1)    | 0.73 (0.1)    | 0.73 (0.1)    | 0.73 (0.1)    | 0.73 (0.1)    | 0.87   | 0.64   |
| CRP, <i>mg/L</i>                               | 1.5 (1.4-1.6) | 1.5 (1.4-1.6) | 1.5 (1.4-1.6) | 1.5 (1.4-1.6) | 1.5 (1.4-1.6) | -      | -      |
| Marine n-3 PUFAs, <i>wt%</i>                   | 8.1 (2.6)     | 7.5 (2.4)     | 8.1 (2.5)     | 8.3 (2.7)     | 8.3 (2.8)     | <0.001 | <0.001 |
| LA, <i>wt%</i>                                 | 20.8 (3.0)    | 21.5 (3.0)    | 21.1 (2.8)    | 20.6 (2.9)    | 20.0 (2.9)    | <0.001 | <0.001 |
| AA, <i>wt%</i>                                 | 9.2 (2.1)     | 9.0 (1.9)     | 9.1 (1.9)     | 9.3 (2.0)     | 9.6 (2.3)     | <0.001 | <0.001 |
| SFA, <i>wt%</i>                                | 42.4 (0.9)    | 42.8 (0.8)    | 42.5 (0.8)    | 42.3 (0.8)    | 42.0 (0.9)    | <0.001 | <0.001 |
| MUFA, <i>wt%</i>                               | 10.3 (1.4)    | 10.1 (1.5)    | 10.1 (1.2)    | 10.3 (1.3)    | 10.6 (1.5)    | <0.001 | <0.001 |

Results are presented as percentage for categorical data, mean value (standard deviation) for continuous data and median value (inter-quartile ranges) for skewed data. Differences between groups were evaluated using Chi square for dichotomous data, the Kruskal-Wallis test for triglycerides, fasting plasma glucose, HbA1c and CRP, and ANOVA for other continuous data. Fatty acids are given as weight percentage (wt%) of total plasma phospholipid fatty acids. Abbreviations: BMI: Body mass index. CKD: Chronic kidney disease. eGFR: Estimated glomerular filtration rate (CKD-EPI formula). ACEi: Angiotensin converting enzyme inhibitor. ARB: Angiotensin receptor blocker. HDL: High density lipoprotein. LDL: Low density lipoproteins. HbA1c: Hemoglobin A1c. cIMT:

Carotid intima-media thickness. CRP: C-reactive protein. PUFA: Polyunsaturated fatty acids. LA: Linoleic acid. AA: Arachidonic acid. SFA: Saturated fatty acids. MUFA: Monounsaturated fatty acids.
